# Supplementary material for: Confined formation of monoclinic Na4Ti5O12 nanoparticles embedded into porous CNTs: towards enhanced electrochemical performances for sodium ion batteries
Source: Royal Society of Chemistry journal article supplement (doi:10.1039/c8nj04398a), 2018-01-01
Supplement: c8nj04398a1.pdf [file c8nj04398a1.pdf]

## Electronic Supplementary Information

Confined formation of monoclinic  $\text{Na}_4\text{Ti}_5\text{O}_{12}$  nanoparticle embedded  
into porous CNTs: towards enhanced electrochemical performances  
for sodium ion batteries

Yakun Tang,<sup>a</sup> Lang Liu,<sup>\*a</sup> Yue Zhang,<sup>a</sup> Hongyang Zhao,<sup>b</sup> Lingbing Kong<sup>c</sup> and Shasha Gao<sup>a</sup>

<sup>a</sup>Key Laboratory of Energy Materials Chemistry, Ministry of Education, Institute of Applied Chemistry, Xinjiang University, Urumqi 830046, Xinjiang, China.

<sup>b</sup>Frontier Institute of Science and Technology Jointly with College of Science, State Key Laboratory for Strength and Vibration of Mechanical Structures, Xi'an Jiaotong University, 99 Yanxiang Road, Yanta District, Xi'an, Shaanxi Province 710054, China.

<sup>c</sup>College of New Materials and New Energies, Shenzhen Technology University, Shenzhen 518118, Guangdong, China.

E-mail: [liulang@xju.edu.cn](mailto:liulang@xju.edu.cn), [llyhs1973@sina.com](mailto:llyhs1973@sina.com)

## Experimental Section

*Materials:* Divinyl benzene (80 %) (DVB) and boron trifluoride diethyl etherate complex were purchased from Aladdin Reagent Company and 4-vinylbenzylchlorid (90 %) (VBC) was purchased from J&K Chemical Reagent Company. All other reagents were commercially available with AR grade and used without further purification. Poly (divinylbenzene-co-4-vinylbenzylchlorid) nanotubes (PNTs) and sulfonated polymer nanotubes (SPNTs) were prepared according to our previously reported methods.<sup>1,2</sup>

*Synthesis of Hybrid Porous CNTs with Embedded M-Na<sub>4</sub>Ti<sub>5</sub>O<sub>12</sub> Nanoparticles:* Firstly, 70 mg SPNTs powder was dispersed in 5 mL ethanol with ultrasonication for 30 min. Secondly, 5 g TBT was added and stirred for 12 h at room temperature to allow a saturated adsorption of the gel into walls of the SPNTs. After centrifugation, the residue was carefully collected and wiped with a piece of tissue paper to remove the excess liquid. The obtained powder was dried in air at 80°C for 12 h, which was denoted as ST. Then, 200 mg ST and 90 mg Na<sub>2</sub>CO<sub>3</sub> powder were mixed and ground in an agate mortar for 15 min at room temperature. The mixture was calcined at 850°C for 6 h in N<sub>2</sub> at a heating rate of 5°C min<sup>-1</sup>, resulting in M-Na<sub>4</sub>Ti<sub>5</sub>O<sub>12</sub> nanoparticles embedded in porous CNTs. The obtained hybrid is denoted as MNTO/C.

*Materials Characterization:* Morphologies and structure features of the samples were studied by using field emission scanning electron microscope (FESEM Hitachi S-4800) and high resolution transmission electron microscope (HRTEM JEOL JEM-2010F). Phase compositions of the samples were characterized by using X-ray diffraction (XRD, Bruker

D8 advance with Cu Ka radiation). Thermogravimetric analysis (TGA) was carried out by using a Netzsch STA 449C at a heating rate of  $10^{\circ}\text{C min}^{-1}$  from 30 to  $800^{\circ}\text{C}$  in air. Nitrogen adsorption-desorption isotherms were recorded by using an Autosorb-iQ Pressure Sorption Analyzer (Quantachrome Instruments U. S.) at 77 K. Specific surface areas of the samples were calculated by using the Brunauer-Emmett-Teller (BET) method, while pore size distributions were calculated by using the Density Functional Theory (DFT) method.

*Electrochemical Characterization:* 2032 coin cells were adopted to measure electrochemical performances of the sample, whereas Na metal was used as the counter and reference electrodes. 70 wt% active materials, 20 wt% carbon black and 10 wt% poly (vinylidene fluoride) binder were dispersed in N-methyl-2-pyrrolidone to form slurries, which were casted on Cu foil and dried at  $110^{\circ}\text{C}$  overnight in vacuum. All cells were assembled in an argon-filled glove box, with glass fiber as the separator and  $\text{NaClO}_4$  (1 M) in ethylene carbonate/dimethyl carbonate (1:1 vol) as the electrolyte. Cyclic voltammograms (CVs) were collected by using an electrochemical workstation (CHI660D, Chenhua, China) at a scan rate of  $0.1 \text{ mV s}^{-1}$ . Galvanostatic charge-discharge tests were carried out by using a Land (CT2001A China) between 0.01 and 3.00 V (versus  $\text{Na}^+/\text{Na}$ ).

## References

1. Y. K. Tang, L. Liu, X. C. Wang, D. Z. Jia, W. Xia, Z. B. Zhao and J. S. Qiu, *J. Power Sources*, 2016, **319**, 227-234.
2. W. Ni, F. X. Liang, J. G. Liu, X. Z. Qu, C. L. Zhang, G. L. Li, Q. Wang and Z. Z. Yang, *Chem. Commun.*, 2011, **47**, 4727-4729.
